# Supplementary material for: Leptin Receptor (rs1137101) and Brain-Derived Neurotrophic Factor (rs925946) Gene Variants Are Associated with Obesity in the Early- but Not in the Late-Onset Population of Hungarian Psoriatic Patients
Source: MDPI journal article supplement (doi:10.3390/life11101086), 2021-10-14
Supplement: s1 [file s1]

# Supplementary Materilas: Leptin Receptor (rs1137101) and Brain-Derived Neurotrophic Factor (rs925946) Gene Variants Are Associated with Obesity in the Early- but Not in the Late-Onset Population of Hungarian Psoriatic Patients

Zita Szentkereszty-Kovács, Szilvia Fiala, Eszter Anna Janka, Dóra Kovács, Andrea Szegedi, Éva Remenyik and Dániel Törőcsik

**Table S1.** Patient characteristics.

|                      | All Patients<br>N = 574 | Early Onset<br>N = 362 | Late Onset<br>N = 212 | Early vs. Late Onset<br>p-value |
|----------------------|-------------------------|------------------------|-----------------------|---------------------------------|
| Mean age (year) ± SD | 50.29 ± 15.55           | 43.92 ± 14.95          | 61.18 ± 9.24          | <0.001                          |
| Gender (%)           |                         |                        |                       | 0.072                           |
| Male                 | 355 (61.8%)             | 234 (64.6%)            | 121 (57.1%)           |                                 |
| Female               | 219 (38.2%)             | 128 (35.4%)            | 91 (42.9%)            |                                 |
| BMI (%)              |                         |                        |                       | <0.001                          |
| Normal weight        | 122 (21.2%)             | 95 (26.2%)             | 27 (12.7%)            |                                 |
| Overweight           | 183 (31.9%)             | 115 (31.8%)            | 68 (32.1%)            |                                 |
| Obese                | 269 (46.9%)             | 152 (42.0%)            | 117 (55.2%)           |                                 |
| Familial form (%)    |                         |                        |                       | <0.001                          |
| Sporadic             | 403 (70.2%)             | 226 (62.4%)            | 177 (83.5%)           |                                 |
| Familial             | 171 (29.8%)             | 136 (37.6%)            | 35 (16.5%)            |                                 |
| Severity (%)         |                         |                        |                       | 0.550                           |
| Mild/Moderate        | 117 (20.4%)             | 71 (19.6%)             | 46 (21.7%)            |                                 |
| Severe               | 457 (79.6%)             | 291 (80.4%)            | 166 (78.3%)           |                                 |

SD – standard deviation.

**Table S2.** The studied genes, the effect alleles and the comparison of allele frequencies in the study groups.

| Gene/SNP   | Effect Allele | Hungarian General Psoriatic Population |                            | P-Value  |
|------------|---------------|----------------------------------------|----------------------------|----------|
|            |               | population (N = 2967)                  | (N = 574)                  |          |
|            |               | Effect Allele<br>Frequency             | Effect Allele<br>Frequency |          |
| LEPR       |               |                                        |                            |          |
| rs1137101  | G             | 0.4584                                 | 0.4649                     | 0.6667   |
| NEGR1      |               |                                        |                            |          |
| rs2815752  | A             | 0.66                                   | 0.6906                     | 0.03328  |
| TMEM18     |               |                                        |                            |          |
| rs2867125  | C             | 0.8145                                 | 0.8456                     | 0.007857 |
| rs6548238  | C             | 0.8137                                 | 0.8427                     | 0.01307  |
| PPARG      |               |                                        |                            |          |
| rs1801282  | C             | 0.8746                                 | 0.8661                     | 0.4041   |
| ADIPOQ     |               |                                        |                            |          |
| rs2241766  | G             | 0.1086                                 | 0.08843                    | 0.02966  |
| rs1501299  | T             | 0.288                                  | 0.2785                     | 0.4912   |
| GNPDA2     |               |                                        |                            |          |
| rs10938397 | G             | 0.4539                                 | 0.4464                     | 0.6204   |
| NPY        |               |                                        |                            |          |
| rs16139    | C             | 0.04545                                | 0.05013                    | 0.4699   |

|             |   |        |        |        |
|-------------|---|--------|--------|--------|
| <i>BDNF</i> |   |        |        |        |
| rs925946    | T | 0.2552 | 0.2711 | 0.2372 |
| rs6265      | C | 0.8036 | 0.8195 | 0.1852 |
| <i>UCP2</i> |   |        |        |        |
| rs660339    | G | 0.5926 | 0.6053 | 0.3958 |
| rs659366    | C | 0.632  | 0.6414 | 0.5323 |
| <i>FTO</i>  |   |        |        |        |
| rs6499640   | A | 0.5878 | 0.6056 | 0.235  |
| rs1558902   | A | 0.453  | 0.4544 | 0.9285 |
| rs1121980   | A | 0.4682 | 0.4733 | 0.7343 |
| rs9939609   | A | 0.438  | 0.4471 | 0.5528 |
| rs9941349   | T | 0.447  | 0.453  | 0.22   |
| <i>MC4R</i> |   |        |        |        |
| rs17782313  | C | 0.222  | 0.2302 | 0.5219 |
| rs12970134  | A | 0.2429 | 0.2464 | 0.792  |

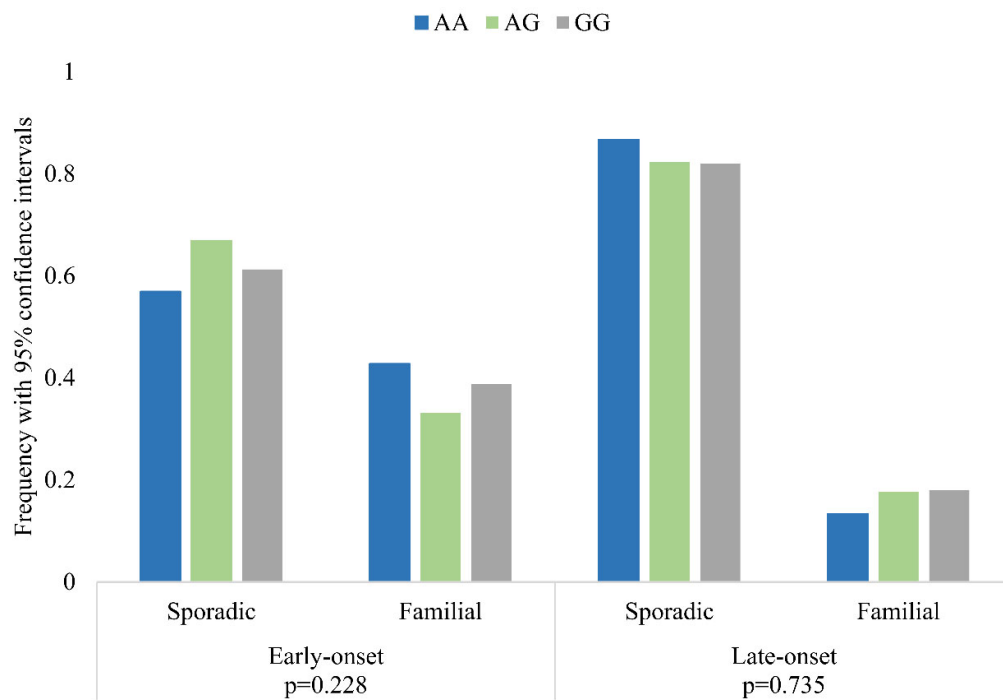

**Figure S1.** The frequency of different genotypes in sporadic and familial form among early- and late-onset psoriatic patients.
